# Supplementary material
Source: PubMed Central journal article supplement (PMC3395234)
Supplement: NIHMS383788-supplement-mmc1-3.pdf [file NIHMS383788-supplement-mmc1-3.pdf]

**Supplementary data- Table S1:** Protein identified by MALDI-TOF analysis in wild-type and  $\beta$  thalassemic mouse red cells analysed by mono-dimensional electrophoresis and reported in Fig. 1a

| <b>Band #</b> | <b>Accession No</b> | <b>Protein Description</b> | <b>matching peptides</b> | <b>Coverage (%)</b> |
|---------------|---------------------|----------------------------|--------------------------|---------------------|
| 1             | Q61171              | Peroxiredoxin-2            | 4                        | 26                  |
| 2             | P01942              | Hemoglobin subunit alpha   | 5                        | 34                  |
| 3             | Q61171              | Peroxiredoxin-2            | 4                        | 27                  |

Accession No: accession number
